# Supplementary material
Source: PubMed Central journal article supplement (PMC7113772)

A)

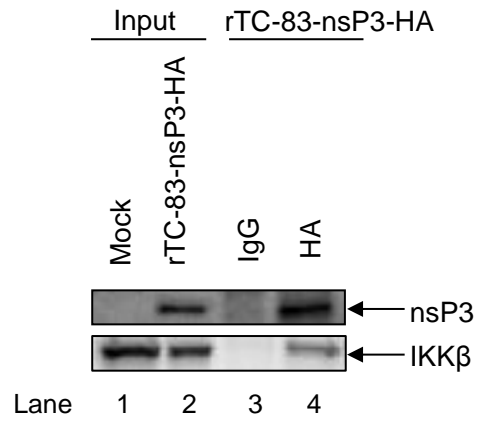

B)

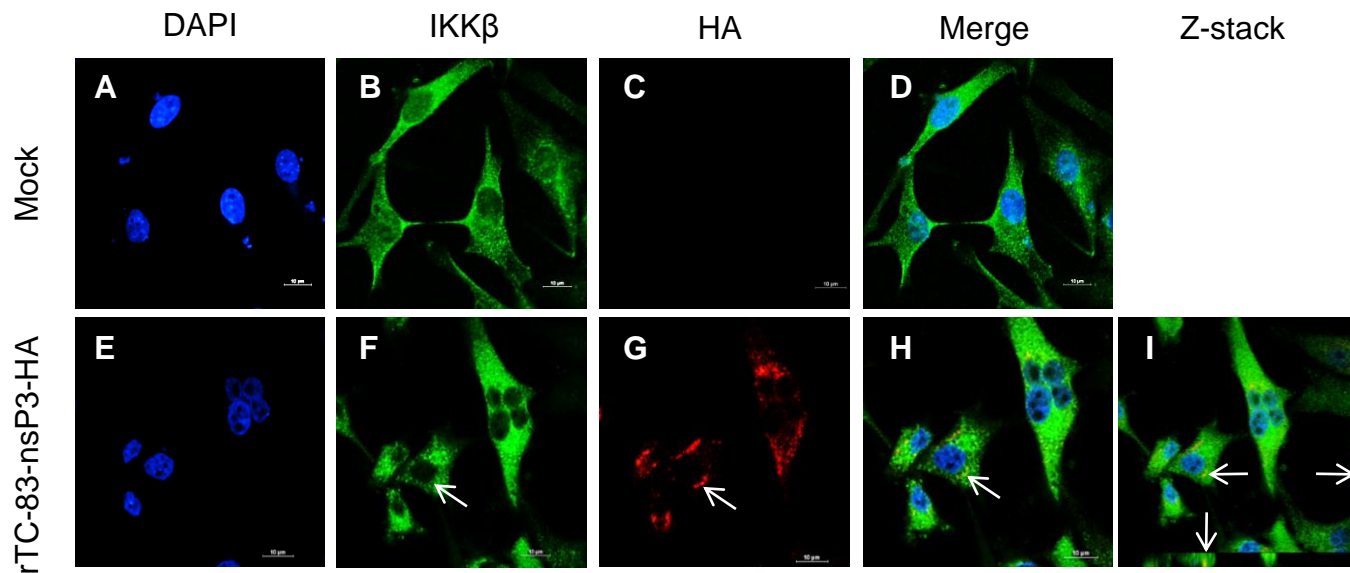

Supplement: mmc1.pdf [file mmc1.pdf]

A)

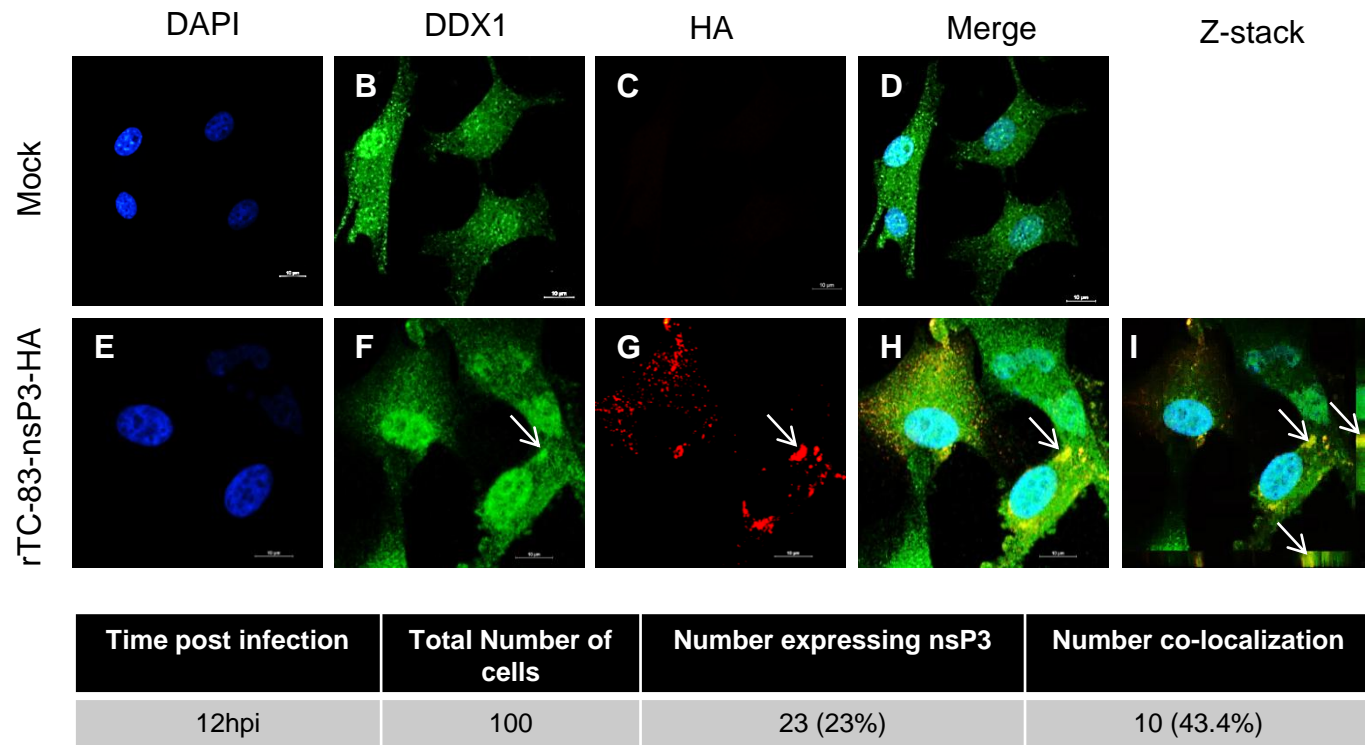

B)

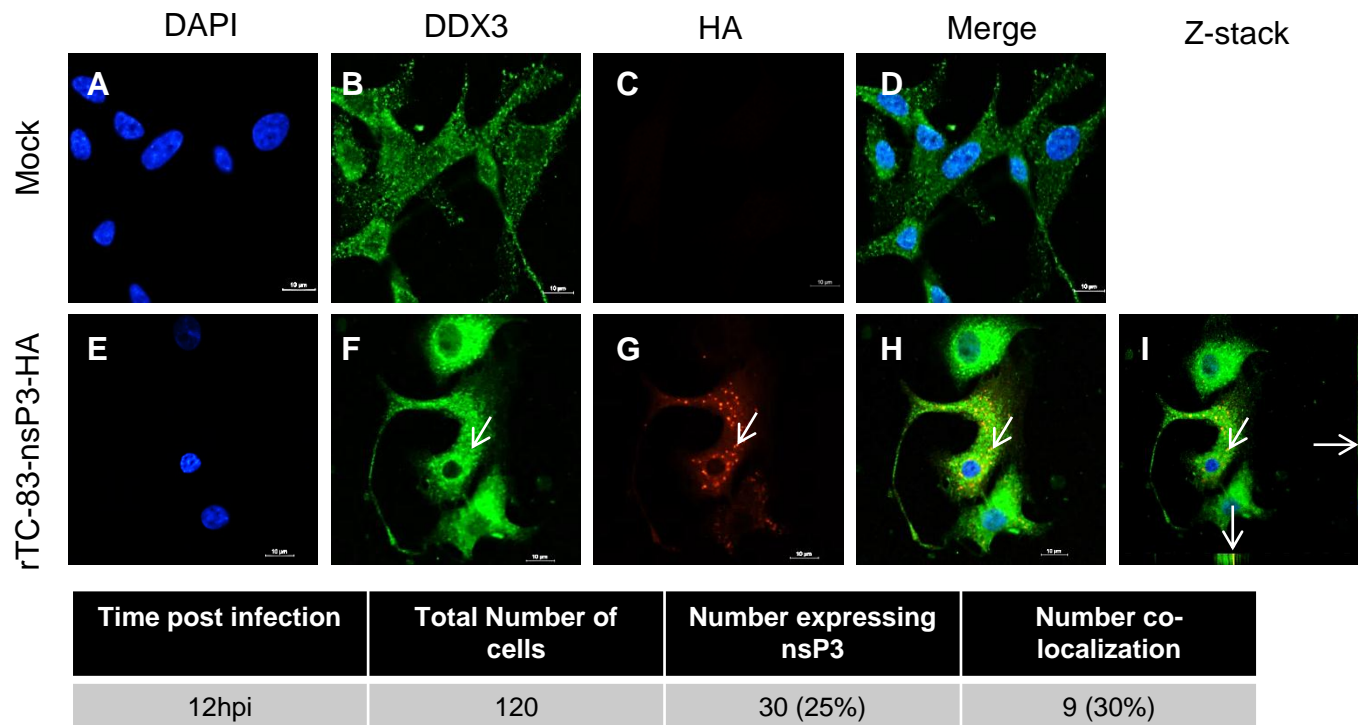

Supplement: mmc2.pdf [file mmc2.pdf]
